# Supplementary material for: Associations of DASH Diet in Pregnancy With Blood Pressure Patterns, Placental Hemodynamics, and Gestational Hypertensive Disorders
Source: PubMed Central journal article supplement — J Am Heart Assoc. 2020 Dec 25;10(1):e017503. doi: 10.1161/JAHA.120.017503 (PMC7955484; doi:10.1161/jaha.120.017503), 2020-12-25

# **Supplemental Material**

**Table S1. Dietary intake of DASH food components by DASH score quartile (n=3,414)\*.**

|                                                         | <b>Total group</b> | <b>DASH quartile 1<br/>score 10-21</b> | <b>DASH quartile 2<br/>score 22-24</b> | <b>DASH quartile 3<br/>score 25-27</b> | <b>DASH quartile 4<br/>score 28-37</b> |                |
|---------------------------------------------------------|--------------------|----------------------------------------|----------------------------------------|----------------------------------------|----------------------------------------|----------------|
|                                                         | <i>n=3,414</i>     | <i>n=860</i>                           | <i>n=798</i>                           | <i>n=836</i>                           | <i>n=920</i>                           | <i>p-value</i> |
| Total grains, g/d                                       | 174 (122 – 218)    | 128 (88 – 177)                         | 168 (117 – 208)                        | 183 (139 – 222)                        | 203 (162 – 246)                        | <0.001         |
| Vegetables (excluding potatoes and condiments), g/d     | 143 (105 – 186)    | 104 (76 – 136)                         | 129 (101 – 160)                        | 151 (121 – 190)                        | 188 (151 – 231)                        | <0.001         |
| Fruits, g/d                                             | 296 (192 – 441)    | 202 (121 – 299)                        | 275 (187 – 414)                        | 319 (214 – 454)                        | 389 (281 – 525)                        | <0.001         |
| Non-full-fat dairy products, g/d                        | 310 (171 – 462)    | 191 (94 – 386)                         | 273 (154 – 445)                        | 326 (204 – 473)                        | 409 (266 – 549)                        | <0.001         |
| Nuts, seeds, legumes, g/d                               | 13 (6 – 23)        | 7 (2 – 13)                             | 11 (5 – 18)                            | 14 (7 – 24)                            | 22 (13 – 35)                           | <0.001         |
| Red and processed meats, g/d                            | 53 (35 – 75)       | 74 (54 – 93)                           | 60 (44 – 78)                           | 49 (34 – 65)                           | 36 (21 – 52)                           | <0.001         |
| Sugar-sweetened beverages, sweets and added sugars, g/d | 65 (33 – 140)      | 156 (83 – 262)                         | 76 (38 – 148)                          | 57 (31 – 99)                           | 39 (21 – 63)                           | <0.001         |
| Sodium, mg/d †                                          | 3317 (937)         | 3464 (982)                             | 3337 (973)                             | 3311 (957)                             | 3168 (814)                             | <0.001         |

DASH, Dietary Approaches to Stop Hypertension. g/d, daily amount in grams and/or milliliters per day. mg/d, daily amount in milligrams per day.

\*Values are median (inter quartile range). †Values are mean (sd).

**Table S2. Non-response analysis: characteristics of participating women with and without data on dietary intake\***

|                                                | <b>Participants with data on dietary intake<sup>†</sup></b> | <b>Participants without data on dietary intake<sup>‡</sup></b> | <i>p-value</i> |
|------------------------------------------------|-------------------------------------------------------------|----------------------------------------------------------------|----------------|
|                                                | <i>n=3,414</i>                                              | <i>n=512</i>                                                   |                |
| Maternal age at enrolment, mean (sd), years    | 31.4 (4.4)                                                  | 30.3 (5.3)                                                     | <0.001         |
| Parity, n nulliparous (%)                      | 2039 (59.9)                                                 | 291 (57.3)                                                     | 0.27           |
| Prepregnancy BMI, mean (sd)                    | 23.1 (3.8)                                                  | 23.1 (4.1)                                                     | 0.80           |
| Pregpregnancy BMI ≥25                          | 655 (22.2)                                                  | 98 (23.1)                                                      | 0.68           |
| Gestational weight gain, mean (sd), kg         | 10.8 (4.4)                                                  | 11.3 (4.8)                                                     | 0.05           |
| Gestational age at intake (weeks) <sup>§</sup> | 14.7 (10.2, 23.1)                                           | 14.1 (10.3, 30.4)                                              | <0.001         |
| Higher education, n (%)                        | 2000 (59.3)                                                 | 232 (46.6)                                                     | <0.001         |
| Smoking, n continued (%)                       | 538 (17.0)                                                  | 116 (25.3)                                                     | <0.001         |
| Alcohol consumption, n continued (%)           | 1570 (50.0)                                                 | 202 (44.4)                                                     | 0.025          |
| Folic acid supplement use, n (%)               | 2493 (89.1)                                                 | 332 (82.0)                                                     | <0.001         |
| Systolic blood pressure, mean (sd), mmHg       |                                                             |                                                                |                |
| Early-pregnancy                                | 117.3 (11.9)                                                | 117.6 (12.3)                                                   | 0.60           |
| Mid-pregnancy                                  | 118.5 (11.7)                                                | 118.5 (10.9)                                                   | 0.92           |
| Late-pregnancy                                 | 120.4 (11.4)                                                | 119.7 (11.4)                                                   | 0.20           |
| Diastolic blood pressure, mean (sd), mmHg      |                                                             |                                                                |                |
| Early-pregnancy                                | 68.5 (9.2)                                                  | 68.1 (9.5)                                                     | 0.48           |
| Mid-pregnancy                                  | 67.2 (9.3)                                                  | 67.0 (9.5)                                                     | 0.61           |
| Late-pregnancy                                 | 69.4 (9.2)                                                  | 69.5 (9.3)                                                     | 0.76           |
| Umbilical artery pulsatility index, mean (sd)  |                                                             |                                                                |                |
| Mid-pregnancy                                  | 1.19 (0.18)                                                 | 1.22 (0.18)                                                    | 0.008          |
| Late-pregnancy                                 | 0.98 (0.17)                                                 | 0.98 (0.18)                                                    | 0.37           |
| Uterine artery resistance index, mean (sd)     |                                                             |                                                                |                |
| Mid-pregnancy                                  | 0.535 (0.089)                                               | 0.545 (0.090)                                                  | 0.08           |
| Late-pregnancy                                 | 0.483 (0.078)                                               | 0.481 (0.077)                                                  | 0.62           |
| Late-pregnancy notching, n (%)                 | 48 (2.2)                                                    | 2 (0.6)                                                        | 0.07           |
| Gestational hypertensive disorders, n (%)      |                                                             |                                                                |                |
| Gestational hypertension                       | 173 (5.3)                                                   | 24 (4.9)                                                       | 0.74           |
| Preeclampsia                                   | 59 (1.9)                                                    | 8 (1.7)                                                        | 0.80           |

\*Values are means (sd) or percentages. <sup>†</sup>Women with data on dietary intake as described in Figure S1<sup>‡</sup> Women without data on dietary intake as described in Figure S2 <sup>§</sup>Median (95% range). <sup>§</sup>Median (95% range).

**Table S3. Longitudinal associations between DASH score and systolic and diastolic blood pressure\***

| <b>Difference in systolic blood pressure (mmHg)</b>  |           |                      |                     |                      |
|------------------------------------------------------|-----------|----------------------|---------------------|----------------------|
| <b>DASH</b>                                          | Intercept | P-value <sup>†</sup> | Slope (mmHg(95%CI)) | P-value <sup>†</sup> |
| Quartile 1                                           | 113.5     | 0.08                 | 0.01 (-0.06, 0.08)  | 0.75                 |
| Quartile 2                                           | 112.5     | 0.56                 | 0.04 (-0.03, 0.10)  | 0.31                 |
| Quartile 3                                           | 113.4     | 0.10                 | -0.05 (-0.11, 0.02) | 0.18                 |
| Quartile 4                                           | 111.9     | Reference            | Reference           | Reference            |
| <b>Difference in diastolic blood pressure (mmHg)</b> |           |                      |                     |                      |
| <b>DASH</b>                                          | Intercept | P-value <sup>†</sup> | Slope (mmHg(95%CI)) | P-value <sup>†</sup> |
| Quartile 1                                           | 100.1     | 0.08                 | 0.01 (-0.04, 0.06)  | 0.70                 |
| Quartile 2                                           | 99.6      | 0.32                 | 0.01 (-0.03, 0.06)  | 0.64                 |
| Quartile 3                                           | 99.7      | 0.25                 | -0.02 (-0.07, 0.04) | 0.54                 |
| Quartile 4                                           | 98.9      | Reference            | Reference           | Reference            |

DASH, Dietary Approaches to Stop Hypertension.

\*Values are based on repeated non-linear regression models and reflect the change in blood pressure in mmHg per DASH quartile compared to women with the highest dietary quality (quartile 4) as reference. Models are adjusted for gestational age at the time of measurements. <sup>†</sup>P-value reflects the significance level of the estimate.

**Table S4. Basic models: associations of maternal DASH score with systolic and diastolic blood pressure in early-, mid- and late-pregnancy (n=3,414).**

| <b>Difference in systolic blood pressure (mmHg)</b>  |                             |                             |                             |
|------------------------------------------------------|-----------------------------|-----------------------------|-----------------------------|
| DASH                                                 | Early-pregnancy<br>n=2,831  | Mid-pregnancy<br>n=3,299    | Late-pregnancy<br>n=3,321   |
| Quartile 1 <sup>†</sup>                              | 1.14 (-0.09, 2.36)<br>n=702 | 1.97 (0.87, 3.08)*<br>n=823 | 1.77 (0.69, 2.85)*<br>n=825 |
| Quartile 2 <sup>†</sup>                              | 0.70 (-0.54, 1.94)<br>n=664 | 1.28 (0.16, 2.41)*<br>n=773 | 1.54 (0.45, 2.64)*<br>n=782 |
| Quartile 3 <sup>†</sup>                              | 0.62 (-0.60, 1.84)<br>n=704 | 0.49 (-0.62, 1.60)<br>n=808 | 0.17 (-0.91, 1.25)<br>n=815 |
| Quartile 4 <sup>†</sup>                              | Reference<br>n=761          | Reference<br>n=895          | Reference<br>n=899          |
| <i>Trend</i> <sup>‡</sup>                            | -0.40 (-0.83, -0.04)        | -0.77 (1.16, -0.37)*        | -0.69 (-1.08, -0.30)*       |
| <b>Difference in diastolic blood pressure (mmHg)</b> |                             |                             |                             |
| DASH                                                 | Early-pregnancy<br>n=2,831  | Mid-pregnancy<br>n=3,298    | Late-pregnancy<br>n=3,320   |
| Quartile 1 <sup>†</sup>                              | 0.69 (-0.25, 1.64)<br>n=702 | 2.19 (1.32, 3.06)*<br>n=822 | 1.11 (0.24, 1.97)*<br>n=825 |
| Quartile 2 <sup>†</sup>                              | 0.38 (-0.58, 1.33)<br>n=664 | 1.57 (0.68, 2.45)*<br>n=773 | 0.75 (-0.13, 1.63)<br>n=781 |
| Quartile 3 <sup>†</sup>                              | 0.23 (-0.71, 1.17)<br>n=704 | 0.76 (-0.12, 1.64)<br>n=808 | 0.20 (-0.67, 1.07)<br>n=815 |
| Quartile 4 <sup>†</sup>                              | Reference<br>n=761          | Reference<br>n=895          | Reference<br>n=899          |
| <i>Trend</i> <sup>‡</sup>                            | -0.28 (-0.58, 0.09)         | -0.79 (-1.10, -0.48)*       | -0.46 (-0.77, -0.15)*       |

DASH, Dietary Approaches to Stop Hypertension.

\* P-value <0.05. <sup>†</sup>Values are regression coefficients (95% confidence interval) and reflect the difference in mmHg blood pressure per DASH quartile. Groups are compared to women with the highest dietary quality (quartile 4) as reference. Models are adjusted for gestational age at the time of intake. Estimates are from multiple imputed data. <sup>‡</sup>Trends were based on multiple linear regression models with DASH as SDS. Models are adjusted for gestational age at the time of intake. Estimates are from multiple imputed data.

**Table S5. Basic models: associations of DASH score with placental vascular function (n=3,414).**

| <b>DASH</b>                | <b>Umbilical artery pulsatility index<sup>†,‡</sup></b> |                                 | <b>Uterine artery resistance index<sup>†,‡</sup></b> |                                | <b>Bilateral notching<sup>‡,§</sup></b>     |
|----------------------------|---------------------------------------------------------|---------------------------------|------------------------------------------------------|--------------------------------|---------------------------------------------|
|                            | Mid-pregnancy<br>n=2,527                                | Late-pregnancy<br>n=2,776       | Mid-pregnancy<br>n=1,898                             | Late-pregnancy<br>n=2,076      | Late-pregnancy<br>n <sub>cases</sub> =48    |
| Quartile 1                 | 0.027 (0.007, 0.047)*<br>n=598                          | 0.038 (0.021, 0.055)*<br>n=672  | 0.000 (-0.011, 0.012)<br>n=433                       | 0.010 (0.001, 0.020)*<br>n=496 | 1.09 (0.51, 2.34)<br>n <sub>cases</sub> =13 |
| Quartile 2                 | 0.024 (0.004, 0.044)*<br>n=600                          | 0.007 (-0.011, 0.024)<br>n=644  | 0.000 (-0.011, 0.011)<br>n=448                       | 0.005 (-0.005, 0.014)<br>n=477 | 0.95 (0.43, 2.11)<br>n <sub>cases</sub> =11 |
| Quartile 3                 | 0.006 (-0.013, 0.026)<br>n=630                          | 0.015 (-0.002, 0.032)<br>n=693  | 0.000 (-0.011, 0.011)<br>n=468                       | 0.001 (-0.009, 0.010)<br>n=516 | 0.80 (0.35, 1.82)<br>n <sub>cases</sub> =10 |
| Quartile 4                 | Reference<br>n=699                                      | Reference<br>n=767              | Reference<br>n=549                                   | Reference<br>n=587             | Reference<br>n <sub>cases</sub> =14         |
| <i>Trend</i> <sup>  </sup> | <i>-0.013 (-0.020, -0.005)*</i>                         | <i>-0.013 (-0.019, -0.007)*</i> | <i>0.000 (-0.004, 0.005)</i>                         | <i>-0.003 (-0.007, 0.000)</i>  | <i>1.02 (0.76, 1.36)</i>                    |

DASH, Dietary Approaches to Stop Hypertension. UmPI, umbilical artery pulsatility index. UtRI, uterine artery resistance index.

\*P-value<0.05. †Values are regression coefficients (95% confidence interval) and reflect differences in UmPI and UtRI per DASH quartile. Groups are compared to women with the highest dietary quality according to the DASH score (quartile 4) as reference. Estimates are from multiple imputed data. ‡Models are adjusted for gestational age at the time of intake. §Values are odds ratios (95% confidence interval) that reflect difference in risks of late-pregnancy notching per DASH quartile. Groups are compared to women with a healthy dietary pattern (quartile 4) as reference. Estimates are from multiple imputed data. || Trends were based on multiple linear regression models with DASH as SDS for UmPI and UtPI, and on multiple logistic regression models with DASH as SDS for bilateral notching.

**Table S6. Longitudinal associations between DASH score and umbilical artery pulsatility index and uterine artery resistance index\***

| <b>DASH</b> | <b>Difference in umbilical artery pulsatility index</b> |                      |                         |                      |
|-------------|---------------------------------------------------------|----------------------|-------------------------|----------------------|
|             | Intercept                                               | P-value <sup>†</sup> | Slope (95% CI)          | P-value <sup>†</sup> |
| Quartile 1  | 1.642                                                   | 0.39                 | 0.0002 (-0.002, 0.002)  | 0.86                 |
| Quartile 2  | 1.690                                                   | 0.01                 | -0.002 (-0.004, -0.000) | 0.04                 |
| Quartile 3  | 1.628                                                   | 0.66                 | -0.0001 (-0.002, 0.002) | 0.96                 |
| Quartile 4  | 1.615                                                   | Reference            | Reference               | Reference            |
| <b>DASH</b> | <b>Difference in uterine artery resistance index</b>    |                      |                         |                      |
|             | Intercept                                               | P-value <sup>†</sup> | Slope (95% CI)          | P-value <sup>†</sup> |
| Quartile 1  | 0.637                                                   | 0.23                 | 0.001 (-0.0002, 0.002)  | 0.70                 |
| Quartile 2  | 0.636                                                   | 0.21                 | 0.001 (-0.0003, 0.002)  | 0.64                 |
| Quartile 3  | 0.651                                                   | 0.77                 | 0.0001 (-0.001, 0.001)  | 0.54                 |
| Quartile 4  | 0.656                                                   | Reference            | Reference               | Reference            |

DASH, Dietary Approaches to Stop Hypertension. CI, Confidence interval.

\*Values are based on repeated non-linear regression models and reflect the change in umbilical artery pulsatility index and uterine artery resistance index per DASH quartile compared to women with the highest dietary quality (quartile 4) as reference. Models are adjusted for gestational age at the time of measurement. <sup>†</sup>P-value reflects the significance level of the estimate.

**Table S7. Secondary outcome: associations of DASH score with uterine artery pulsatility index (n=3,414).**

|                           |                                    | Absolute values and differences in UtPI |                                        |
|---------------------------|------------------------------------|-----------------------------------------|----------------------------------------|
|                           |                                    | Mid-pregnancy<br><i>n</i> =1,530        | Late-pregnancy<br><i>n</i> =1,747      |
| <b>DASH</b>               |                                    |                                         |                                        |
| Quartile 1                | Absolute mean value (sd) *         | 0.895 (0.275)                           | 0.751 (0.199)                          |
|                           | Basic model <sup>†,‡</sup>         | 0.020 (-0.017, 0.057)                   | 0.022 (-0.004, 0.048)                  |
|                           | Confounder model <sup>†,§</sup>    | 0.013 (-0.026, 0.053)<br><i>n</i> =342  | 0.013 (-0.015, 0.041)<br><i>n</i> =417 |
| Quartile 2                | Absolute mean value (sd) *         | 0.883 (0.261)                           | 0.736 (0.189)                          |
|                           | Basic model <sup>†,‡</sup>         | 0.009 (-0.028, 0.045)                   | 0.007 (-0.019, 0.032)                  |
|                           | Confounder model <sup>†,§</sup>    | 0.010 (-0.027, 0.046)<br><i>n</i> =354  | 0.006 (-0.020, 0.033)<br><i>n</i> =408 |
| Quartile 3                | Absolute mean value (sd) *         | 0.875 (0.252)                           | 0.735 (0.206)                          |
|                           | Basic model <sup>†,‡</sup>         | 0.000 (-0.35, 0.036)                    | 0.006 (-0.019, 0.031)                  |
|                           | Confounder model <sup>†,§</sup>    | 0.000 (-0.036, 0.035)<br><i>n</i> =394  | 0.004 (-0.021, 0.029)<br><i>n</i> =438 |
| Quartile 4                | Absolute mean value (sd) *         | 0.875 (0.256)                           | 0.729 (0.187)                          |
|                           | Basic model <sup>†,‡</sup>         | Reference                               | Reference                              |
|                           | Confounder model <sup>†,§</sup>    | Reference<br><i>n</i> =440              | Reference<br><i>n</i> =484             |
| <i>Trend</i> <sup>d</sup> | Basic model <sup>†,  </sup>        | -0.004 (-0.017)                         | -0.006 (-0.015, 0.003)                 |
|                           | Confounder model <sup>†,§,  </sup> | -0.001 (-0.015, 0.014)                  | -0.003 (-0.013, 0.007)                 |

UtPI, Uterine artery pulsatility index. DASH, Dietary Approaches to Stop Hypertension. Sd, standard deviation. CI, Confidence Interval.

\*Values are mean UtPI values (sd) and reflect the absolute value in uterine artery pulsatility index per DASH Quartile. P-values for comparison of absolute values among the four DASH quartiles were obtained by ANOVA (mid-pregnancy UtPI, p-value=0.693; late-pregnancy UtPI, p-value 0.387).

†Values are regression coefficients (95% confidence interval) and reflect differences in UtPI per DASH Quartile. Groups are compared to women with the highest dietary quality according to the DASH score (Quartile 4) as reference. Estimates are from multiple imputed data. R<sup>2</sup> values for confounder models: mid-pregnancy UtPI, R<sup>2</sup>=0.02; late-pregnancy UtPI, R<sup>2</sup>=0.02.‡Models are adjusted for gestational age at intake.§Models are adjusted for maternal age, educational level, parity, prepregnancy BMI, smoking habits, alcohol use, folic acid use, total energy intake and gestational age at time of the measurements.||Trends were based on multiple linear regression models with DASH dietary score as SDS. R<sup>2</sup> values for confounder models: mid-pregnancy UtPI, R<sup>2</sup>=0.02; late-pregnancy UtPI, R<sup>2</sup>=0.08.



**Table S8. Basic models: associations of maternal DASH score the risks of gestational hypertensive disorder (3,414)\*.**

|                           | <b>Gestational hypertensive disorders</b> | <b>Gestational hypertension</b> | <b>Preeclampsia</b>         |
|---------------------------|-------------------------------------------|---------------------------------|-----------------------------|
|                           | Odds ratio (95% CI)                       | Odds ratio (95% CI)             | Odds ratio (95% CI)         |
| <b>DASH</b>               | <b>n<sub>cases</sub>=232</b>              | <b>n<sub>cases</sub>=173</b>    | <b>n<sub>cases</sub>=59</b> |
| Quartile 1                | 1.31 (0.91, 1.88)                         | 1.22 (0.81, 1.84)               | 1.62 (0.79, 3.30)           |
|                           | n <sub>cases</sub> =70                    | n <sub>cases</sub> =51          | n <sub>cases</sub> =19      |
| Quartile 2                | 0.96 (0.65, 1.42)                         | 1.05 (0.68, 1.61)               | 0.62 (0.25, 1.57)           |
|                           | n <sub>cases</sub> =49                    | n <sub>cases</sub> =42          | n <sub>cases</sub> =7       |
| Quartile 3                | 1.00 (0.69, 1.47)                         | 0.81 (0.51, 1.27)               | 1.70 (0.84, 3.43)           |
|                           | n <sub>cases</sub> =54                    | n <sub>cases</sub> =34          | n <sub>cases</sub> =20      |
| Quartile 4                | Reference                                 | Reference                       | Reference                   |
|                           | n <sub>cases</sub> =59                    | n <sub>cases</sub> =46          | n <sub>cases</sub> =13      |
| <i>Trend</i> <sup>†</sup> | <i>0.90 (0.79, 1.03)</i>                  | <i>0.90 (0.77, 1.05)</i>        | <i>0.90 (0.70, 1.16)</i>    |

DASH, Dietary Approaches to Stop Hypertension. CI, Confidence Interval.

\*Values are odds ratios (95% confidence interval) that reflect difference in risks of gestational hypertensive disorders, gestational hypertension and preeclampsia per DASH quartile. Groups are compared to women with the highest dietary quality according to the DASH score (quartile 4) as reference. Estimates are from multiple imputed data. Models are adjusted for gestational age at the time of intake. <sup>†</sup>Trends were based on multiple logistic regression models with DASH as SDS.

**Table S9. Sensitivity analysis: associations of maternal DASH score with systolic and diastolic blood pressure in early-, mid- and late-pregnancy in participants without pre-existent diabetes or gestational diabetes (n=3,378).**

|                           |                                       | <b>Absolute values and differences in systolic blood pressure (mmHg)</b>  |                                               |                                                |
|---------------------------|---------------------------------------|---------------------------------------------------------------------------|-----------------------------------------------|------------------------------------------------|
| DASH                      |                                       | Early-pregnancy<br><i>n</i> =2,802                                        | Mid-pregnancy<br><i>n</i> =3,263              | Late-pregnancy<br><i>n</i> =3,286              |
| Quartile 1                | Absolute mean value (sd) <sup>†</sup> | 117.65 (11.79)                                                            | 119.43 (12.02)                                | 121.14 (12.01)                                 |
|                           | Basic model <sup>‡,§</sup>            | 0.98 (-0.24, 2.20)                                                        | 1.91* (0.80, 3.02)                            | 1.66* (0.58, 2.73)                             |
|                           | Confounder model <sup>‡,  </sup>      | -0.53 (-1.77, 0.70)<br><i>n</i> =692                                      | 0.01 (-1.14, 1.15)<br><i>n</i> =809           | -0.26 (-1.38, 0.86)<br><i>n</i> =811           |
| Quartile 2                | Absolute mean value (sd) <sup>†</sup> | 117.17 (12.38)                                                            | 118.77 (12.23)                                | 120.93 (11.68)                                 |
|                           | Basic model <sup>‡,§</sup>            | 0.48 (-0.76, 1.72)                                                        | 1.22* (0.09, 2.35)                            | 1.44* (0.35, 2.54)                             |
|                           | Confounder model <sup>‡,  </sup>      | -0.51 (-1.68, 0.67)<br><i>n</i> =657                                      | 0.06 (-1.02, 1.13)<br><i>n</i> =765           | 0.38 (-0.67, 1.43)<br><i>n</i> =774            |
| Quartile 3                | Absolute mean value (sd) <sup>†</sup> | 117.17 (12.27)                                                            | 117.94 (11.71)                                | 119.64 (10.92)                                 |
|                           | Basic model <sup>‡,§</sup>            | 0.53 (-0.69, 1.75)                                                        | 0.43 (-0.69, 1.54)                            | 0.16 (-0.92, 1.24)                             |
|                           | Confounder model <sup>‡,  </sup>      | -0.06 (-1.20, 1.08)<br><i>n</i> =696                                      | -0.18 (-1.22, 0.87)<br><i>n</i> =799          | -0.34 (-1.37, 0.68)<br><i>n</i> =806           |
| Quartile 4                | Absolute mean value (sd) <sup>†</sup> | 116.63 (10.97)                                                            | 117.48 (10.89)                                | 119.48 (10.81)                                 |
|                           | Basic model <sup>‡,§</sup>            | Reference                                                                 | Reference                                     | Reference                                      |
|                           | Confounder model <sup>‡,  </sup>      | Reference<br><i>n</i> =757                                                | Reference<br><i>n</i> =890                    | Reference<br><i>n</i> =895                     |
| <i>Trend</i> <sup>‡</sup> | <i>Basic model</i> <sup>‡</sup>       | -0.33 (-0.76, 0.11)                                                       | -0.75* (-1.15, -0.35)                         | -0.66* (-1.05, -0.27)                          |
|                           | <i>Confounder model</i> <sup>§</sup>  | 0.26(-0.19, 0.71)                                                         | -0.01 (-0.43, 0.41)                           | 0.10 (-0.31, 0.51)                             |
|                           |                                       | <b>Absolute values and differences in diastolic blood pressure (mmHg)</b> |                                               |                                                |
| DASH                      |                                       | Early-pregnancy <sup>†</sup><br><i>n</i> =2,802                           | Mid-pregnancy <sup>†</sup><br><i>n</i> =3,262 | Late-pregnancy <sup>†</sup><br><i>n</i> =3,285 |
| Quartile 1                | Absolute mean value (sd) <sup>†</sup> | 68.80 (9.14)                                                              | 68.22 (9.74)                                  | 69.86 (9.59)                                   |
|                           | Basic model <sup>‡,§</sup>            | 0.65 (-0.29, 1.59)                                                        | 2.16* (1.28, 3.03)                            | 1.03* (0.16, 1.90)                             |
|                           | Confounder model <sup>‡,  </sup>      | 0.15 (-0.81, 1.10)<br><i>n</i> =692                                       | 1.34* (0.44, 2.24)<br><i>n</i> =808           | 0.04 (-0.84, 0.93)<br><i>n</i> =811            |
| Quartile 2                | Absolute <sup>†</sup>                 | 68.43 (10.00)                                                             | 67.56 (9.70)                                  | 69.47 (9.25)                                   |
|                           | Basic model <sup>‡,§</sup>            | 0.25 (-0.70, 1.21)                                                        | 1.49* (0.60, 2.37)                            | 0.63 (-0.25, 1.51)                             |
|                           | Confounder model <sup>‡,  </sup>      | -0.25 (-1.16, 0.66)                                                       | 0.82 (-0.02, 1.66)                            | -0.08 (-0.91, 0.75)                            |

|                           |                                       |                     |                       |                       |
|---------------------------|---------------------------------------|---------------------|-----------------------|-----------------------|
|                           |                                       | n=657               | n=765                 | n=773                 |
| Quartile 3                | Absolute mean value (sd) <sup>†</sup> | 68.28 (8.97)        | 66.77 (8.87)          | 68.97 (8.73)          |
|                           | Basic model <sup>‡,§</sup>            | 0.16 (-0.78, 1.10)  | 0.71 (-0.17, 1.59)    | 0.13 (-0.74, 1.00)    |
|                           | Confounder model <sup>‡,  </sup>      | -0.25 (-1.13, 0.63) | 0.30 (-0.52, 1.12)    | -0.26 (-1.07, 0.55)   |
|                           |                                       | n=696               | n=799                 | n=806                 |
| Quartile 4                | Absolute mean value (sd) <sup>†</sup> | 68.10 (8.54)        | 66.05 (8.50)          | 68.83 (8.96)          |
|                           | Basic model <sup>‡,§</sup>            | Reference           | Reference             | Reference             |
|                           | Confounder model <sup>‡,  </sup>      | Reference           | Reference             | Reference             |
|                           |                                       | n=757               | n=890                 | n=895                 |
| <i>Trend</i> <sup>#</sup> | <i>Basic model</i> <sup>‡</sup>       | -0.23 (-0.57, 0.11) | -0.79* (-1.10, -0.47) | -0.43* (-0.74, -0.12) |
|                           | <i>Confounder model</i> <sup>  </sup> | -0.03 (-0.37, 0.32) | -0.47* (-0.80, -0.14) | -0.04 (-0.36, 0.28)   |

DASH, Dietary Approaches to Stop Hypertension. Sd, standard deviation. SBP, systolic blood pressure. DBP, diastolic blood pressure.

\* P-value<0.05. <sup>†</sup>Values are mean blood pressure values (sd) and reflect the absolute value in SBP and DBP per DASH Quartile. P-values for comparison of absolute values among the four DASH quartiles were obtained by ANOVA (early-pregnancy SBP, p-value=0.433; mid-pregnancy SBP, p-value=0.003; late-pregnancy SBP, p-value=0.003; early-pregnancy DBP, p-value=0.522; mid-pregnancy DBP, p-value<0.001; late-pregnancy DBP, p-value=0.081). <sup>‡</sup>Values are regression coefficients (95% confidence interval) and reflect the difference in mmHg blood pressure per DASH Quartile. Groups are compared to women with the lowest DASH dietary score (Quartile 4) as reference. Estimates are from multiple imputed data. R<sup>2</sup> values for confounder models: early-pregnancy SBP, R<sup>2</sup>=0.14; mid-pregnancy SBP, R<sup>2</sup>=0.15, late-pregnancy SBP, R<sup>2</sup>=0.12; early-pregnancy DBP, R<sup>2</sup>=0.14; mid-pregnancy DBP, R<sup>2</sup>=0.16; late-pregnancy, R<sup>2</sup>=0.15. <sup>§</sup>Models are adjusted for gestational age at intake. <sup>||</sup>Models are adjusted for maternal age, educational level, parity, prepregnancy BMI, smoking habits, alcohol use, folic acid use, total energy intake and gestational age at time of the measurements. <sup>#</sup>Trends were based on multiple linear regression models with DASH dietary score as SDS. R<sup>2</sup> values for confounder models: early-pregnancy SBP, R<sup>2</sup>=0.14; mid-pregnancy SBP, R<sup>2</sup>=0.15, late-pregnancy SBP, R<sup>2</sup>=0.12; early-pregnancy DBP, R<sup>2</sup>=0.14; mid-pregnancy DBP, R<sup>2</sup>=0.16; late-pregnancy, R<sup>2</sup>=0.15.

**Table S10. Sensitivity analysis: associations of DASH score with placental vascular function in participants without pre-existent or gestational diabetes (n=3,378).**

| DASH               |                                       | Absolute values and differences in UmPI <sup>*,†</sup> |                                | Absolute values and differences in UtRI <sup>*,†</sup> |                                | Bilateral notching <sup>‡,†</sup>           |
|--------------------|---------------------------------------|--------------------------------------------------------|--------------------------------|--------------------------------------------------------|--------------------------------|---------------------------------------------|
|                    |                                       | Mid-pregnancy<br>n=2,060                               | Late-pregnancy<br>n=2,751      | Mid-pregnancy<br>n=1,884                               | Late-pregnancy<br>n=2,505      | Late-pregnancy<br>n <sub>cases</sub> =48    |
| Quartile 1         | Absolute mean value (sd) <sup>†</sup> | 1.201 (0.181)                                          | 0.999 (0.177)                  | 0.536 (0.091)                                          | 0.490 (0.076)                  | n.a.                                        |
|                    | Basic model <sup>‡,§</sup>            | 0.026* (0.006, 0.046)                                  | 0.036* (0.019, 0.053)          | 0.000 (-0.11, 0.012)                                   | 0.010* (0.001, 0.020)          | 1.05 (0.52, 2.37)                           |
|                    | Confounder model <sup>‡,  </sup>      | 0.011 (-0.010, 0.032)<br>n=489                         | 0.024* (0.006, 0.043)<br>n=661 | -0.003 (-0.015, 0.010)<br>n=428                        | 0.009 (-0.001, 0.019)<br>n=589 | 1.12 (0.51, 2.45)<br>n <sub>cases</sub> =13 |
| Quartile 2         | Absolute mean value (sd) <sup>†</sup> | 1.199 (0.184)                                          | 0.969 (0.160)                  | 0.535 (0.090)                                          | 0.484 (0.076)                  | n.a.                                        |
|                    | Basic model <sup>‡,§</sup>            | 0.024* (0.004, 0.044)                                  | 0.007 (-0.010, 0.024)          | 0.000 (-0.011, 0.012)                                  | 0.005 (-0.005, 0.014)          | 0.96 (0.43, 2.13)                           |
|                    | Confounder model <sup>‡,  </sup>      | 0.019 (-0.001, 0.039)<br>n=473                         | 0.002 (-0.016, 0.019)<br>n=637 | 0.000 (-0.011, 0.011)<br>n=446                         | 0.005 (-0.004, 0.014)<br>n=596 | 0.95 (0.43, 2.11)<br>n <sub>cases</sub> =11 |
| Quartile 3         | Absolute mean value (sd) <sup>†</sup> | 1.180 (0.186)                                          | 0.978 (0.163)                  | 0.535 (0.089)                                          | 0.480 (0.081)                  | n.a.                                        |
|                    | Basic model <sup>‡,§</sup>            | 0.005 (-0.014, 0.025)                                  | 0.015 (-0.002, 0.032)          | 0.000 (-0.011, 0.012)                                  | 0.000 (-0.009, 0.010)          | 0.81 (0.36, 1.84)                           |
|                    | Confounder model <sup>‡,  </sup>      | 0.008 (-0.011, 0.27)<br>n=511                          | 0.015 (-0.002, 0.032)<br>n=686 | 0.000 (-0.012, 0.011)<br>n=463                         | 0.000 (-0.010, 0.009)<br>n=623 | 0.83 (0.37, 1.89)<br>n <sub>cases</sub> =10 |
| Quartile 4         | Absolute mean value (sd) <sup>†</sup> | 1.174 (0.182)                                          | 0.962 (0.162)                  | 0.535 (0.088)                                          | 0.479 (0.077)                  | n.a.                                        |
|                    | Basic model <sup>‡,§</sup>            | Reference                                              | Reference                      | Reference                                              | Reference                      | Reference                                   |
|                    | Confounder model <sup>‡,  </sup>      | Reference<br>n=587                                     | Reference<br>n=767             | Reference<br>n=547                                     | Reference<br>n=697             | Reference<br>n <sub>cases</sub> =14         |
| Trend <sup>#</sup> | Basic model <sup>‡</sup>              | -0.012* (-0.019, -0.005)                               | -0.013* (-0.019, -0.006)       | 0.001 (-0.004, 0.005)                                  | -0.003 (-0.007, 0.000)         | 1.01 (0.76, 1.35)                           |
|                    | Confounder model <sup>§</sup>         | -0.006 (-0.014, 0.001)                                 | -0.008* (-0.015, -0.001)       | 0.002 (-0.003, 0.006)                                  | -0.003 (-0.006, 0.001)         | 1.01 (0.76, 1.36)                           |

UmPI, umbilical artery pulsatility index. UtRI, umbilical artery resistance index. DASH, Dietary Approaches to Stop Hypertension. Sd, standard deviation. \* P-value<0.05. †Values are mean values (sd) and reflect the absolute value in UmPI and UtRI per DASH Quartile. P-values for comparison of absolute values among the four DASH quartiles were obtained by ANOVA (mid-pregnancy UmPI, p-value=0.016; late-pregnancy UmPI, p-value<0.001; mid-pregnancy UtRI, p-value=1.000; late-pregnancy UtRI, p-value=0.108). ‡Values for UmPI and UtRI are regression coefficients (95% confidence interval) and reflect the difference in UmPI and UtRI per DASH Quartile. Values for bilateral notching are odds ratios (95% confidence interval) that reflect difference in risks of bilateral notching per DASH Quartile. Groups are compared to women with the lowest DASH dietary score (Quartile 4) as reference. Estimates are from multiple imputed data. R<sup>2</sup> values for confounder models: mid-pregnancy UmPI, R<sup>2</sup>=0.07; late-pregnancy UmPI, R<sup>2</sup>=0.04; mid-pregnancy UtRI,

R<sup>2</sup>=0.02; late-pregnancy UtRI, R<sup>2</sup>=0.03; bilateral notching R<sup>2</sup>=0.01.<sup>§</sup>Models are adjusted for gestational age at intake. <sup>||</sup> Models for UmPI and UtRI are adjusted for maternal age, educational level, parity, prepregnancy BMI, smoking habits, alcohol use, folic acid use, total energy intake and gestational age at time of the measurements. Models for bilateral notching are adjusted for parity, prepregnancy BMI, folic acid use and gestational age at time of measurement. <sup>#</sup>Trends were based on multiple linear regression models with DASH dietary score as SDS for UmPI and UtRI; and on multiple logistic regression models with DASH dietary score as SDS for bilateral notching. R<sup>2</sup> values for confounder models: mid-pregnancy UmPI, R<sup>2</sup>=0.07; late-pregnancy UmPI, R<sup>2</sup>=0.04; mid-pregnancy UtRI, R<sup>2</sup>=0.02; late-pregnancy UtRI, R<sup>2</sup>=0.03; bilateral notching R<sup>2</sup>=0.01.

**Table S11. Sensitivity analysis: associations of maternal DASH score the risks of gestational hypertensive disorder in participants without pre-existent or gestational diabetes (n=3,378)\*.**

|                           |                               | <b>Gestational hypertensive disorders</b>      | <b>Gestational hypertension</b>                | <b>Preeclampsia</b>                            |
|---------------------------|-------------------------------|------------------------------------------------|------------------------------------------------|------------------------------------------------|
| <b>DASH</b>               |                               | Odds ratio (95% CI)<br>n <sub>cases</sub> =224 | Odds ratio (95% CI)<br>n <sub>cases</sub> =166 | Odds ratio (95% CI)<br>n <sub>cases</sub> =224 |
| Quartile 1                | Basic model <sup>†</sup>      | 1.31 (0.91, 1.88)                              | 1.21 (0.80, 1.84)                              | 1.63 (0.80, 3.33)                              |
|                           | Confounder model <sup>‡</sup> | 1.15 (0.79, 1.69)                              | 1.04 (0.67, 1.61)                              | 1.50 (0.72, 3.16)                              |
| Quartile 2                | Basic model <sup>†</sup>      | 0.89 (0.60, 1.34)                              | 1.00 (0.64, 1.55)                              | 0.54 (0.20, 1.41)                              |
|                           | Confounder model <sup>‡</sup> | 0.79 (0.53, 1.20)                              | 0.87 (0.55, 1.37)                              | 0.50 (0.19, 1.33)                              |
| Quartile 3                | Basic model <sup>†</sup>      | 1.01 (0.69, 1.48)                              | 0.81 (0.51, 1.28)                              | 1.71 (0.84, 3.45)                              |
|                           | Confounder model <sup>‡</sup> | 0.96 (0.65, 1.43)                              | 0.74 (0.46, 1.18)                              | 1.78 (0.87, 3.62)                              |
| Quartile 4                | Basic model <sup>†</sup>      | Reference                                      | Reference                                      | Reference                                      |
|                           | Confounder model <sup>‡</sup> | Reference                                      | Reference                                      | Reference                                      |
| <i>Trend</i> <sup>§</sup> | Basic model <sup>†</sup>      | 0.91 (0.79, 1.04)                              | 0.91 (0.78, 1.06)                              | 0.90 (0.69, 1.16)                              |
|                           | Confounder model <sup>‡</sup> | 0.96 (0.83, 1.11)                              | 0.96 (0.82, 1.14)                              | 0.93 (0.71, 1.22)                              |

DASH, Dietary Approaches to Stop Hypertension. CI, Confidence Interval. GHD, Gestational hypertensive disorders. GH, Gestational Hypertension. PE, Preeclampsia.

\*Values are odds ratios (95% confidence interval) that reflect difference in risks of gestational hypertensive disorders, gestational hypertension and preeclampsia per DASH Quartile. Groups are compared to women with the lowest DASH dietary score (Quartile 1) as reference. Estimates are from multiple imputed data. R<sup>2</sup> values for confounder models: GHD, R<sup>2</sup>=0.09; GH, R<sup>2</sup>=0.09; PE, R<sup>2</sup>=0.08. <sup>†</sup>Models are adjusted for gestational age at intake. <sup>‡</sup> Models are adjusted for parity, prepregnancy BMI, folic acid use and gestational age at time of intake. <sup>§</sup>Trends were based on multiple logistic regression models with DASH dietary score as SDS. R<sup>2</sup> values for confounder models: GHD, R<sup>2</sup>=0.08; GH, R<sup>2</sup>=0.09; PE, R<sup>2</sup>=0.06.

**Table S12. Sensitivity analysis: associations of maternal DASH score with systolic and diastolic blood pressure in early-, mid- and late-pregnancy in participants without heart condition or hypercholesterolemia (n=3,356)\*.**

|                    |                                       | <b>Absolute values and differences in systolic blood pressure (mmHg)</b>  |                                       |                                         |
|--------------------|---------------------------------------|---------------------------------------------------------------------------|---------------------------------------|-----------------------------------------|
| DASH               |                                       | Early-pregnancy <sup>†</sup><br>n=2,789                                   | Mid-pregnancy <sup>†</sup><br>n=3,246 | Late-pregnancy <sup>†</sup><br>n=3,265  |
| Quartile 1         | Absolute mean value (sd) <sup>†</sup> | 117.77 (11.84)                                                            | 119.56 (12.05)                        | 121.25 (12.17)                          |
|                    | Basic model <sup>‡,§</sup>            | 1.09 (-0.14, 2.33)                                                        | 2.07* (0.95, 3.18)                    | 1.73* (0.64, 2.82)                      |
|                    | Confounder model <sup>‡,  </sup>      | -0.44 (-1.68, 0.81)<br>n=688                                              | 0.12 (-1.03, 1.26)<br>n=809           | -0.20 (-1.33, 0.93)<br>n=808            |
| Quartile 2         | Absolute mean value (sd) <sup>†</sup> | 117.44 (12.61)                                                            | 118.82 (12.21)                        | 121.04 (11.75)                          |
|                    | Basic model <sup>‡,§</sup>            | 0.75 (-0.50, 2.00)                                                        | 1.30* (0.17, 2.43)                    | 1.51* (0.41, 2.61)                      |
|                    | Confounder model <sup>‡,  </sup>      | -0.35 (-1.54, 0.83)<br>n=655                                              | 0.06 (-1.02, 1.14)<br>n=762           | 0.39 (-0.67, 1.45)<br>n=771             |
| Quartile 3         | Absolute mean value (sd) <sup>†</sup> | 117.26 (12.29)                                                            | 118.02 (11.68)                        | 119.68 (10.95)                          |
|                    | Basic model <sup>‡,§</sup>            | 0.61 (-0.62, 1.84)                                                        | 0.52 (-0.60, 1.64)                    | 0.15 (-0.94, 1.25)                      |
|                    | Confounder model <sup>‡,  </sup>      | -0.01 (-1.16, 1.15)<br>n=696                                              | -0.11 (-1.17, 0.94)<br>n=795          | -0.36 (1.40, 0.68)<br>n=802             |
| Quartile 4         | Absolute mean value (sd) <sup>†</sup> | 116.63 (11.02)                                                            | 117.45 (10.93)                        | 119.51 (10.87)                          |
|                    | Basic model <sup>‡,§</sup>            | Reference                                                                 | Reference                             | Reference                               |
|                    | Confounder model <sup>‡,  </sup>      | Reference<br>n=750                                                        | Reference<br>n=880                    | Reference<br>n=884                      |
| Trend <sup>#</sup> | Basic model <sup>‡</sup>              | -0.38 (-0.82, 0.06)                                                       | -0.79* (-1.19, -0.39)                 | -0.67* (-1.07, -0.28)                   |
|                    | Confounder model <sup>§</sup>         | 0.23 (-0.23, 0.68)                                                        | -0.03 (-0.45, 0.39)                   | 0.10 (-0.31, 0.51)                      |
|                    |                                       | <b>Absolute values and differences in diastolic blood pressure (mmHg)</b> |                                       |                                         |
| DASH               |                                       | Early-pregnancy <sup>†</sup><br>n=2,789                                   | Mid-pregnancy <sup>†</sup><br>n=3,245 | Late-pregnancy <sup>†</sup><br>n= 3,264 |
| Quartile 1         | Absolute mean value (sd) <sup>†</sup> | 68.70 (9.01)                                                              | 68.27 (9.80)                          | 69.88 (9.62)                            |
|                    | Basic model <sup>‡,§</sup>            | 0.56 (-0.39, 1.50)                                                        | 2.20* (1.32, 3.09)                    | 1.03* (0.15, 1.90)                      |
|                    | Confounder model <sup>‡,  </sup>      | 0.02 (-0.94, 0.97)<br>n=688                                               | 1.28* (0.37, 2.18)<br>n=808           | 0.01 (-0.88, 0.90)<br>n=808             |
| Quartile 2         | Absolute mean value (sd) <sup>†</sup> | 68.61 (10.08)                                                             | 67.67 (9.76)                          | 69.53 (9.26)                            |
|                    | Basic model <sup>‡,§</sup>            | 0.45 (-0.51, 1.41)                                                        | 1.60* (0.70, 2.50)                    | 0.67 (-0.21, 1.56)                      |
|                    | Confounder model <sup>‡,  </sup>      | -0.15 (-1.06, 0.76)                                                       | 0.84* (-0.01, 1.69)                   | -0.10 (-0.94, 0.73)                     |

|                           |                                       |                     |                       |                       |
|---------------------------|---------------------------------------|---------------------|-----------------------|-----------------------|
|                           |                                       | n=655               | n=762                 | n=770                 |
| Quartile 3                | Absolute mean value (sd) <sup>†</sup> | 68.32 (9.03)        | 66.80 (8.90)          | 69.03 (8.75)          |
|                           | Basic model <sup>‡,§</sup>            | 0.20 (-0.74, 1.15)  | 0.73 (-0.16, 1.62)    | 1.18 (-0.70, 1.05)    |
|                           | Confounder model <sup>‡,  </sup>      | -0.23 (-1.11, 0.66) | 0.29 (-0.54, 1.11)    | -0.22 (-1.03, 0.59)   |
|                           |                                       | n=696               | n=795                 | n=802                 |
| Quartile 4                | Absolute mean value (sd) <sup>†</sup> | 68.10 (8.57)        | 66.06 (8.55)          | 68.85 (9.01)          |
|                           | Basic model <sup>‡,§</sup>            | Reference           | Reference             | Reference             |
|                           | Confounder model <sup>‡,  </sup>      | Reference           | Reference             | Reference             |
|                           |                                       | n=750               | n=880                 | n=884                 |
| <i>Trend</i> <sup>#</sup> | <i>Basic model</i> <sup>‡</sup>       | -0.21 (-0.54, 0.13) | -0.80* (-1.11, -0.48) | -0.43* (-0.74, -0.12) |
|                           | <i>Confounder model</i> <sup>§</sup>  | 0.01 (-0.34, 0.36)  | -0.43* (-0.77, -0.10) | -0.02 (-0.35, 0.30)   |

DASH, Dietary Approaches to Stop Hypertension. Sd, standard deviation. SBP, systolic blood pressure. DBP, diastolic blood pressure.

\* P-value<0.05. <sup>†</sup>Values are mean blood pressure values (sd) and reflect the absolute value in SBP and DBP per DASH Quartile. P-values for comparison of absolute values among the four DASH quartiles were obtained by ANOVA (early-pregnancy SBP, p-value=0.324; mid-pregnancy SBP, p-value=0.001; late-pregnancy SBP, p-value=0.002; early-pregnancy DBP, p-value=0.324; mid-pregnancy DBP, p-value=0.001; late-pregnancy DBP, p-value=0.002). <sup>‡</sup>Values are regression coefficients (95% confidence interval) and reflect the difference in mmHg blood pressure per DASH Quartile. Groups are compared to women with the lowest DASH dietary score (Quartile 4) as reference. Estimates are from multiple imputed data. R<sup>2</sup> values for confounder models: early-pregnancy SBP, R<sup>2</sup>=0.14; mid-pregnancy SBP, R<sup>2</sup>=0.15, late-pregnancy SBP, R<sup>2</sup>=0.12; early-pregnancy DBP, R<sup>2</sup>=0.14; mid-pregnancy DBP, R<sup>2</sup>=0.16; late-pregnancy, R<sup>2</sup>=0.15.<sup>§</sup>Models are adjusted for gestational age at intake.<sup>||</sup>Models are adjusted for maternal age, educational level, parity, prepregnancy BMI, smoking habits, alcohol use, folic acid use, total energy intake and gestational age at time of the measurements. <sup>#</sup>Trends were based on multiple linear regression models with DASH dietary score as SDS. R<sup>2</sup> values for confounder models: early-pregnancy SBP, R<sup>2</sup>=0.14; mid-pregnancy SBP, R<sup>2</sup>=0.15, late-pregnancy SBP, R<sup>2</sup>=0.12; early-pregnancy DBP, R<sup>2</sup>=0.14; mid-pregnancy DBP, R<sup>2</sup>=0.16; late-pregnancy, R<sup>2</sup>=0.15.



**Table S13. Sensitivity analysis: associations of DASH score with placental vascular function in participants heart condition or hypercholesterolemia (n=3,356).**

| DASH               |                                       | Absolute values and differences in UmPI <sup>*,†</sup> |                                | Absolute values and differences in UtRI <sup>*,†</sup> |                                | Bilateral notching <sup>‡,†</sup>           |
|--------------------|---------------------------------------|--------------------------------------------------------|--------------------------------|--------------------------------------------------------|--------------------------------|---------------------------------------------|
|                    |                                       | Mid-pregnancy<br>n=2,482                               | Late-pregnancy<br>n=2,729      | Mid-pregnancy<br>n=1,864                               | Late-pregnancy<br>n=2,042      | Late-pregnancy<br>n <sub>cases</sub> =47    |
| Quartile 1         | Absolute mean value (sd) <sup>†</sup> | 1.201 (0.182)                                          | 1.000 (0.178)                  | 0.535 (0.091)                                          | 0.490 (0.076)                  | n.a.                                        |
|                    | Basic model <sup>‡,§</sup>            | 0.026* (0.006, 0.047)                                  | 0.037* (0.020, 0.054)          | 0.001 (-0.011, 0.012)                                  | 0.010* (0.001, 0.020)          | 1.17 (0.54, 2.56)                           |
|                    | Confounder model <sup>‡,  </sup>      | 0.011(-0.010, 0.033)<br>n=587                          | 0.025* (0.007, 0.044)<br>n=659 | -0.002 (-0.014, 0.010)<br>n=423                        | 0.010 (0.000, 0.020)<br>n=487  | 1.2 (0.454, 2.67)<br>n <sub>cases</sub> =13 |
| Quartile 2         | Absolute mean value (sd) <sup>†</sup> | 1.198 (0.184)                                          | 0.970 (0.160)                  | 0.535 (0.089)                                          | 0.484 (0.076)                  | n.a.                                        |
|                    | Basic model <sup>‡,§</sup>            | 0.024* (0.004, 0.044)                                  | 0.006 (-0.011, 0.024)          | 0.001 (-0.011, 0.012)                                  | 0.005 (-0.005, 0.014)          | 1.01 (0.45, 2.28)                           |
|                    | Confounder model <sup>‡,  </sup>      | 0.019 (-0.001, 0.039)<br>n=589                         | 0.002(-0.016, 0.019)<br>n=634  | 0.001 (-0.011, 0.012)<br>n=440                         | 0.006 (-0.004, 0.015)<br>n=471 | 0.88 (0.39, 2.03)<br>n <sub>cases</sub> =11 |
| Quartile 3         | Absolute mean value (sd) <sup>†</sup> | 1.180 (0.186)                                          | 0.975 (0.163)                  | 0.534 (0.089)                                          | 0.480 (0.081)                  | n.a.                                        |
|                    | Basic model <sup>‡,§</sup>            | 0.006 (-0.014, 0.026)                                  | 0.012 (-0.005, 0.029)          | 0.000 (-0.011, 0.011)                                  | 0.000 (-0.009, 0.010)          | 0.86 (0.37, 1.98)                           |
|                    | Confounder model <sup>‡,  </sup>      | 0.009 (-0.011, 0.028)<br>n=621                         | 0.012(-0.005, 0.029)<br>n=681  | -0.001 (-0.012, 0.010)<br>n=461                        | 0.000 (-0.009, 0.009)<br>n=508 | 0.87 (0.38, 2.01)<br>n <sub>cases</sub> =10 |
| Quartile 4         | Absolute mean value (sd) <sup>†</sup> | 1.174 (0.182)                                          | 0.963 (0.162)                  | 0.535 (0.088)                                          | 0.479 (0.077)                  | n.a.                                        |
|                    | Basic model <sup>‡,§</sup>            | Reference                                              | Reference                      | Reference                                              | Reference                      | Reference                                   |
|                    | Confounder model <sup>‡,  </sup>      | Reference<br>n=685                                     | Reference<br>n=755             | Reference<br>n=540                                     | Reference<br>n=576             | Reference<br>n <sub>cases</sub> =13         |
| Trend <sup>#</sup> | Basic model <sup>‡</sup>              | -0.012* (-0.019, -0.005)                               | -0.013* (-0.019, -0.007)       | 0.000 (-0.004, 0.004)                                  | -0.003 (-0.007, 0.000)         | 0.97 (0.74, 1.33)                           |
|                    | Confounder model <sup>§</sup>         | -0.007 (-0.014, 0.001)                                 | -0.008* (-0.015, -0.001)       | 0.001 (-0.003, 0.006)                                  | -0.003 (-0.007, 0.001)         | 0.99 (0.74, 1.33)                           |

UmPI, umbilical artery pulsatility index. UtRI, umbilical artery resistance index. DASH, Dietary Approaches to Stop Hypertension. Sd, standard deviation. \* P-value<0.05. †Values are mean values (sd) and reflect the absolute value in UmPI and UtRI per DASH Quartile. P-values for comparison of absolute values among the four DASH quartiles were obtained by ANOVA (mid-pregnancy UmPI, p-value=0.019; late-pregnancy UmPI, p-value<0.001; mid-pregnancy UtRI, p-value=0.998; late-pregnancy UtRI, p-value=0.101). ‡Values for UmPI and UtRI are regression coefficients (95% confidence interval) and reflect the difference in UmPI and UtRI per DASH Quartile. Values for bilateral notching are odds ratios (95% confidence interval) that reflect difference in risks of bilateral notching per DASH Quartile. Groups are compared to women with the lowest DASH dietary score (Quartile 4) as reference. Estimates are from

multiple imputed data. R-squared values for confounder models: mid-pregnancy UmPI,  $R^2=0.07$ ; late-pregnancy UmPI,  $R^2=0.04$ ; mid-pregnancy UtRI,  $R^2=0.02$ ; late-pregnancy UtRI,  $R^2=0.03$ ; bilateral notching  $R^2=0.01$ ). <sup>§</sup>Models are adjusted for gestational age at intake. <sup>||</sup> Models for UmPI and UtRI are adjusted for maternal age, educational level, parity, prepregnancy BMI, smoking habits, alcohol use, folic acid use, total energy intake and gestational age at time of the measurements. Models for bilateral notching are adjusted for parity, prepregnancy BMI, folic acid use and gestational age at time of measurement. <sup>#</sup>Trends were based on multiple linear regression models with DASH dietary score as SDS for UmPI and UtRI; and on multiple logistic regression models with DASH dietary score as SDS for bilateral notching. R-squared values for confounder models: mid-pregnancy UmPI,  $R^2=0.07$ ; late-pregnancy UmPI,  $R^2=0.04$ ; mid-pregnancy UtRI,  $R^2=0.02$ ; late-pregnancy UtRI,  $R^2=0.03$ ; bilateral notching  $R^2=0.01$ ).

**Table S14. Sensitivity analysis: associations of maternal DASH score the risks of gestational hypertensive disorder in participants without heart condition or hypercholesterolemia (n=3,356)\*.**

|                    |                               | Gestational hypertensive disorders             | Gestational hypertension                       | Preeclampsia                                  |
|--------------------|-------------------------------|------------------------------------------------|------------------------------------------------|-----------------------------------------------|
| DASH               |                               | Odds ratio (95% CI)<br>n <sub>cases</sub> =227 | Odds ratio (95% CI)<br>n <sub>cases</sub> =167 | Odds ratio (95% CI)<br>n <sub>cases</sub> =59 |
| Quartile 1         | Basic model <sup>†</sup>      | 1.32 (0.92, 1.90)                              | 1.23 (0.81, 1.86)                              | 1.63 (0.80, 3.32)                             |
|                    | Confounder model <sup>‡</sup> | 1.17 (0.80, 1.71)                              | 1.06 (0.69, 1.64)                              | 1.49 (0.71, 3.12)                             |
| Quartile 2         | Basic model <sup>†</sup>      | 0.95 (0.64, 1.41)<br>n <sub>cases</sub> =69    | 1.04 (0.68, 1.61)<br>n <sub>cases</sub> =50    | 0.62 (0.25, 1.57)<br>n <sub>cases</sub> =19   |
|                    | Confounder model <sup>‡</sup> | 0.83 (0.55, 1.25)                              | 0.90 (0.58, 1.41)                              | 0.57 (0.22, 1.44)                             |
| Quartile 3         | Basic model <sup>†</sup>      | 0.98 (0.67, 1.45)<br>n <sub>cases</sub> =48    | 0.78 (0.49, 1.24)<br>n <sub>cases</sub> =41    | 1.70 (0.84, 3.44)<br>n <sub>cases</sub> =7    |
|                    | Confounder model <sup>‡</sup> | 0.93 (0.63, 1.38)                              | 0.70 (0.44, 1.13)                              | 1.74 (0.85, 3.55)                             |
| Quartile 4         | Basic model <sup>†</sup>      | Reference<br>n <sub>cases</sub> =52            | Reference<br>n <sub>cases</sub> =32            | Reference<br>n <sub>cases</sub> =20           |
|                    | Confounder model <sup>‡</sup> | Reference                                      | Reference                                      | Reference                                     |
| Trend <sup>§</sup> | Basic model <sup>†</sup>      | 0.89 (0.78, 1.02)<br>n <sub>cases</sub> =58    | 0.89 (0.77, 1.04)<br>n <sub>cases</sub> =45    | 0.90 (0.69, 1.15)<br>n <sub>cases</sub> =13   |
|                    | Confounder model <sup>‡</sup> | 0.94 (0.82, 1.09)                              | 0.94 (0.80, 1.11)                              | 0.93 (0.71, 1.22)                             |

DASH, Dietary Approaches to Stop Hypertension. GHD, Gestational hypertensive disorders. GH, Gestational Hypertension. PE, Preeclampsia.

\*Values are odds ratios (95% confidence interval) that reflect difference in risks of gestational hypertensive disorders, gestational hypertension and preeclampsia per DASH Quartile. Groups are compared to women with the lowest DASH dietary score (Quartile 1) as reference. Estimates are from multiple imputed data. R<sup>2</sup> values for confounder models: GHD, R<sup>2</sup>=0.09; GH, R<sup>2</sup>=0.09; PE, R<sup>2</sup>=0.09). <sup>†</sup>Models are adjusted for gestational age at intake. <sup>‡</sup>Models are adjusted for parity, prepregnancy BMI, folic acid use and gestational age at time of intake. <sup>§</sup>Trends were based on multiple logistic regression models with DASH dietary score as SDS. R<sup>2</sup> values for confounder models: GHD, R<sup>2</sup>=0.09; GH, R<sup>2</sup>=0.09; PE, R<sup>2</sup>=0.07).

**Table S15. Sensitivity analysis: associations of maternal DASH score with systolic and diastolic blood pressure in early-, mid- and late-pregnancy in participants enrolled in the first trimester of pregnancy (n=1,888).**

|                          |                                       | <b>Absolute values and differences in systolic blood pressure (mmHg)</b>  |                                                    |                                                     |
|--------------------------|---------------------------------------|---------------------------------------------------------------------------|----------------------------------------------------|-----------------------------------------------------|
| <b>DASH</b>              |                                       | <b>Early-pregnancy<sup>†</sup></b><br><i>n=1,869</i>                      | <b>Mid-pregnancy<sup>†</sup></b><br><i>n=1,854</i> | <b>Late-pregnancy<sup>†</sup></b><br><i>n=1,842</i> |
| Quartile 1               | Absolute mean value (sd) <sup>†</sup> | 118.03 (11.97)                                                            | 120.14 (11.80)                                     | 120.96 (12.16)                                      |
|                          | Basic model <sup>‡,§</sup>            | 1.03 (-0.48, 2.55)                                                        | 2.02* (0.52, 3.51)                                 | 0.73 (-0.74, 2.19)                                  |
|                          | Confounder model <sup>‡,  </sup>      | -0.10 (-1.64, 1.43)                                                       | 0.81 (-0.71, 2.32)                                 | -0.52 (-2.02, 0.97)                                 |
|                          |                                       | <i>n=464</i>                                                              | <i>n=462</i>                                       | <i>n=457</i>                                        |
| Quartile 2               | Absolute mean value (sd) <sup>†</sup> | 117.66 (12.59)                                                            | 119.47 (12.10)                                     | 120.71 (11.95)                                      |
|                          | Basic model <sup>‡,§</sup>            | 0.67 (-0.86, 2.19)                                                        | 1.35 (-0.16, 2.85)                                 | 0.47 (-1.00, 1.95)                                  |
|                          | Confounder model <sup>‡,  </sup>      | -0.12 (-1.56, 1.32)                                                       | 0.48 (-0.95, 1.90)                                 | -0.28 (-1.68, 1.13)                                 |
|                          |                                       | <i>n=450</i>                                                              | <i>n=447</i>                                       | <i>n=445</i>                                        |
| Quartile 3               | Absolute mean value (sd) <sup>†</sup> | 117.67 (12.10)                                                            | 118.89 (12.12)                                     | 119.82 (11.06)                                      |
|                          | Basic model <sup>‡,§</sup>            | 0.70 (-0.81, 2.21)                                                        | 0.75 (-0.74, 2.25)                                 | -0.40 (-1.86, 1.06)                                 |
|                          | Confounder model <sup>‡,  </sup>      | -0.07 (-1.45, 1.39)                                                       | 0.01 (-1.39, 1.42)                                 | -1.06 (-2.44, 0.32)                                 |
|                          |                                       | <i>n=462</i>                                                              | <i>n=457</i>                                       | <i>n=456</i>                                        |
| Quartile 4               | Absolute mean value (sd) <sup>†</sup> | 116.95 (11.03)                                                            | 118.15 (10.83)                                     | 120.21 (10.56)                                      |
|                          | Basic model <sup>‡,§</sup>            | Reference                                                                 | Reference                                          | Reference                                           |
|                          | Confounder model <sup>‡,  </sup>      | Reference                                                                 | Reference                                          | Reference                                           |
|                          |                                       | <i>n=493</i>                                                              | <i>n=488</i>                                       | <i>n=484</i>                                        |
| <i>Trend<sup>#</sup></i> | <i>Basic model<sup>‡</sup></i>        | <i>-0.36 (-0.90, 0.18)</i>                                                | <i>-0.78* (-1.32, -0.25)</i>                       | <i>-0.35 (-0.87, 0.18)</i>                          |
|                          | <i>Confounder model<sup>§</sup></i>   | <i>0.04 (-0.52, 0.60)</i>                                                 | <i>-0.35 (-0.90, 0.21)</i>                         | <i>0.11 (-0.44, 0.65)</i>                           |
|                          |                                       | <b>Absolute values and differences in diastolic blood pressure (mmHg)</b> |                                                    |                                                     |
| <b>DASH</b>              |                                       | <b>Early-pregnancy<sup>†</sup></b><br><i>n=1,869</i>                      | <b>Mid-pregnancy<sup>†</sup></b><br><i>n=1,853</i> | <b>Late-pregnancy<sup>†</sup></b><br><i>n=1,841</i> |
| Quartile 1               | Absolute mean value (sd) <sup>†</sup> | 69.43 (9.31)                                                              | 68.60 (9.75)                                       | 69.89 (9.53)                                        |
|                          | Basic model <sup>‡,§</sup>            | 1.03 (-0.15, 2.21)                                                        | 2.36* (1.17, 3.54)                                 | 0.44 (-0.73, 1.60)                                  |
|                          | Confounder model <sup>‡,  </sup>      | 0.80 (-0.38, 1.97)                                                        | 1.87* (0.68, 3.07)                                 | -0.20 (-1.35, 0.95)                                 |
|                          |                                       | <i>n=464</i>                                                              | <i>n=461</i>                                       | <i>n=457</i>                                        |
| Quartile 2               | Absolute mean value (sd) <sup>†</sup> | 69.15 (10.06)                                                             | 68.06 (9.90)                                       | 69.59 (9.27)                                        |
|                          | Basic model <sup>‡,§</sup>            | 0.76 (-0.43, 1.94)                                                        | 1.81* (0.62, 3.01)                                 | 0.14 (-1.04, 1.31)                                  |
|                          | Confounder model <sup>‡,  </sup>      | 0.35 (-0.76, 1.45)                                                        | 1.28* (0.16, 2.40)                                 | -0.47 (-1.55, 0.62)                                 |

|                           |                                       |                     |                       |                     |
|---------------------------|---------------------------------------|---------------------|-----------------------|---------------------|
|                           |                                       | n=450               | n=447                 | n=444               |
| Quartile 3                | Absolute mean value (sd) <sup>†</sup> | 68.88 (9.23)        | 67.15 (9.17)          | 69.20 (8.98)        |
|                           | Basic model <sup>‡,§</sup>            | 0.48 (-0.69, 1.66)  | 0.88 (-0.31, 2.07)    | -0.24 (-1.41, 0.93) |
|                           | Confounder model <sup>‡,  </sup>      | -0.08 (-1.17, 1.01) | 0.30 (-0.81, 1.40)    | -0.86 (-1.92, 0.21) |
|                           |                                       | n=462               | n=457                 | n=456               |
| Quartile 4                | Absolute mean value (sd) <sup>†</sup> | 68.40 (8.42)        | 66.29 (8.39)          | 69.43 (8.74)        |
|                           | Basic model <sup>‡,§</sup>            | Reference           | Reference             | Reference           |
|                           | Confounder model <sup>‡,  </sup>      | Reference           | Reference             | Reference           |
|                           |                                       | n=493               | n=488                 | n=484               |
| <i>Trend</i> <sup>#</sup> | <i>Basic model</i> <sup>‡</sup>       | -0.39 (-0.81, 0.03) | -0.80* (-1.23, -0.38) | -0.24 (-0.66, 0.18) |
|                           | <i>Confounder model</i> <sup>§</sup>  | -0.32 (-0.75, 0.11) | -0.63* (-1.07, -0.19) | -0.01 (-0.43, 0.41) |

DASH, Dietary Approaches to Stop Hypertension. Sd, standard deviation. SBP, systolic blood pressure. DBP, diastolic blood pressure.

\* P-value<0.05. <sup>†</sup>Values are mean blood pressure values (sd) and reflect the absolute value in SBP and DBP per DASH Quartile. P-values for comparison of absolute values among the four DASH quartiles were obtained by ANOVA (early-pregnancy SBP, p-value=0.553; mid-pregnancy SBP, p-value=0.059; late-pregnancy SBP, p-value=0.435; early-pregnancy DBP, p-value=0.359; mid-pregnancy DBP, p-value=0.001; late-pregnancy DBP, p-value=0.716). <sup>‡</sup>Values are regression coefficients (95% confidence interval) and reflect the difference in mmHg blood pressure per DASH Quartile. Groups are compared to women with the lowest DASH dietary score (Quartile 4) as reference. Estimates are from multiple imputed data. R<sup>2</sup> values for confounder models: early-pregnancy SBP, R<sup>2</sup>=0.14; mid-pregnancy SBP, R<sup>2</sup>=0.14, late-pregnancy SBP, R<sup>2</sup>=0.13; early-pregnancy DBP, R<sup>2</sup>=0.16; mid-pregnancy DBP, R<sup>2</sup>=0.16; late-pregnancy, R<sup>2</sup>=0.18. <sup>§</sup>Models are adjusted for gestational age at intake. <sup>||</sup>Models are adjusted for maternal age, educational level, parity, prepregnancy BMI, smoking habits, alcohol use, folic acid use, total energy intake and gestational age at time of the measurements. <sup>#</sup>Trends were based on multiple linear regression models with DASH dietary score as SDS. R<sup>2</sup> values for confounder models: early-pregnancy SBP, R<sup>2</sup>=0.14; mid-pregnancy SBP, R<sup>2</sup>=0.14, late-pregnancy SBP, R<sup>2</sup>=0.13; early-pregnancy DBP, R<sup>2</sup>=0.16; mid-pregnancy DBP, R<sup>2</sup>=0.16; late-pregnancy, R<sup>2</sup>=0.18.

**Table S16. Sensitivity analysis: associations of DASH score with placental vascular function in participants enrolled in the first trimester of pregnancy (n=1,888).**

|                    |                                       | Absolute values and differences in UmPI <sup>*,†</sup> |                                      | Absolute values and differences in UtRI <sup>*,†</sup> |                                 | Bilateral notching <sup>†</sup>            |
|--------------------|---------------------------------------|--------------------------------------------------------|--------------------------------------|--------------------------------------------------------|---------------------------------|--------------------------------------------|
| DASH               |                                       | Mid-pregnancy<br>n=1,518                               | Late-pregnancy<br>n=1,618            | Mid-pregnancy<br>n=1,231                               | Late-pregnancy<br>n=1,164       | Late-pregnancy<br>n <sub>cases</sub> =30   |
| Quartile 1         | Absolute mean value (sd) <sup>†</sup> | 1.209 (0.180)                                          | 1.002 (0.173)                        | 0.536 (0.089)                                          | 0.490 (0.075)                   | n.a.                                       |
|                    | Basic model <sup>‡,§</sup>            | 0.022 (-0.004, 0.048)                                  | 0.035 <sup>§</sup> (0.013, 0.057)    | 0.000 (-0.014, 0.015)                                  | 0.012 (0.000, 0.024)            | 0.50 (0.17, 1.47)                          |
|                    | Confounder model <sup>‡,  </sup>      | 0.001 (-0.026, 0.028)<br>n=361                         | 0.017 (-0.006, 0.041)<br>n=397       | 0.002 (-0.014, 0.017)<br>n=271                         | 0.013 (0.000, 0.026)<br>n=297   | 0.53 (0.18, 1.56)<br>n <sub>cases</sub> =5 |
| Quartile 2         | Absolute mean value (sd) <sup>†</sup> | 1.196 (0.188)                                          | 0.960 (0.156)                        | 0.536 (0.092)                                          | 0.486 (0.077)                   | n.a.                                       |
|                    | Basic model <sup>‡,§</sup>            | 0.010 (-0.016, 0.036)                                  | -0.007 (-0.029, 0.016)               | 0.000 (-0.014, 0.015)                                  | 0.008 (-0.005, 0.020)           | 0.55 (0.19, 1.60)                          |
|                    | Confounder model <sup>‡,  </sup>      | 0.005 (-0.020, 0.031)<br>n=371                         | -0.015 (-0.037, 0.008)<br>n=382      | 0.002 (-0.012, 0.017)<br>n=282                         | 0.008 (-0.004, 0.021)<br>n=276  | 0.54 (0.18, 1.57)<br>n <sub>cases</sub> =5 |
| Quartile 3         | Absolute mean value (sd) <sup>†</sup> | 1.190 (0.176)                                          | 0.973 (0.159)                        | 0.532 (0.089)                                          | 0.478 (0.081)                   | n.a.                                       |
|                    | Basic model <sup>‡,§</sup>            | 0.005 (-0.021, 0.030)                                  | 0.007 (-0.015, 0.029)                | -0.004 (-0.018, 0.010)                                 | -0.001 (-0.013, 0.011)          | 0.86 (0.35, 2.10)                          |
|                    | Confounder model <sup>‡,  </sup>      | 0.008 (-0.017, 0.033)<br>n=383                         | 0.005 (-0.017, 0.027)<br>n=412       | -0.002 (-0.016, 0.013)<br>n=291                        | -0.000 (-0.012, 0.011)<br>n=321 | 0.85 (0.35, 2.08)<br>n <sub>cases</sub> =9 |
| Quartile 4         | Absolute mean value (sd) <sup>†</sup> | 1.185 (0.183)                                          | 0.965 (0.164)                        | 0.536 (0.090)                                          | 0.478 (0.074)                   | n.a.                                       |
|                    | Basic model <sup>‡,§</sup>            | Reference                                              | Reference                            | Reference                                              | Reference                       | Reference                                  |
|                    | Confounder model <sup>‡,  </sup>      | Reference<br>n=403                                     | Reference<br>n=427                   | Reference<br>n=320                                     | Reference<br>n=337              | Reference<br>n <sub>cases</sub> =11        |
| Trend <sup>#</sup> | Basic model <sup>‡</sup>              | -0.008 (-0.017, 0.002)                                 | -0.009 <sup>§</sup> (-0.018, -0.001) | 0.000 (-0.005, 0.005)                                  | 0.000 (-0.008, 0.000)           | 1.45 (0.99, 2.14)                          |
|                    | Confounder model <sup>§</sup>         | 0.000 (-0.009, 0.010)                                  | -0.002 (-0.010, 0.007)               | -0.001 (-0.006, 0.005)                                 | -0.004 (-0.009, 0.000)          | 1.45 (0.98, 2.16)                          |

UmPI, umbilical artery pulsatility index. UtRI, umbilical artery resistance index. DASH, Dietary Approaches to Stop Hypertension. Sd, standard deviation. \* P-value<0.05. †Values are mean values (sd) and reflect the absolute value in UmPI and UtRI per DASH Quartile. P-values for comparison of absolute values among the four DASH quartiles were obtained by ANOVA (mid-pregnancy UmPI, p-value=0.308; late-pregnancy UmPI, p-value=0.002; mid-pregnancy UtRI, p-value=0.927; late-pregnancy UtRI, p-value=0.123). ‡Values for UmPI and UtRI are regression coefficients (95% confidence interval) and reflect the difference in UmPI and UtRI per DASH Quartile. Values for bilateral notching are odds ratios (95% confidence interval) that reflect difference in risks of bilateral notching per DASH Quartile. Groups are compared to women with the lowest DASH dietary score (Quartile 4) as reference. Estimates are from

multiple imputed data. R<sup>2</sup> values for confounder models: mid-pregnancy UmPI, R<sup>2</sup>=0.07; late-pregnancy UmPI, R<sup>2</sup>=0.05; mid-pregnancy UtRI, R<sup>2</sup>=0.02; late-pregnancy UtRI, R<sup>2</sup>=0.04; bilateral notching R<sup>2</sup>=0.02. §Models are adjusted for gestational age at intake. ¶Models for UmPI and UtRI are adjusted for maternal age, educational level, parity, prepregnancy BMI, smoking habits, alcohol use, folic acid use, total energy intake and gestational age at time of the measurements. Models for bilateral notching are adjusted for parity, prepregnancy BMI, folic acid use and gestational age at time of measurement. #Trends were based on multiple linear regression models with DASH dietary score as SDS for UmPI and UtRI; and on multiple logistic regression models with DASH dietary score as SDS for bilateral notching. R<sup>2</sup> values for confounder models: mid-pregnancy UmPI, R<sup>2</sup>=0.07; late-pregnancy UmPI, R<sup>2</sup>=0.05; mid-pregnancy UtRI, R<sup>2</sup>=0.02; late-pregnancy UtRI, R<sup>2</sup>=0.04; bilateral notching R<sup>2</sup>=0.02.

**Table S17. Sensitivity analysis: associations of maternal DASH score the risks of gestational hypertensive disorder in participants enrolled in the first trimester of pregnancy (n=1,888)\*.**

|                    |                               | <b>Gestational hypertensive disorders</b>          | <b>Gestational hypertension</b>               | <b>Preeclampsia</b>                           |
|--------------------|-------------------------------|----------------------------------------------------|-----------------------------------------------|-----------------------------------------------|
|                    |                               | Odds ratio (95% CI)<br>n <sub>cases</sub> =124     | Odds ratio (95% CI)<br>n <sub>cases</sub> =96 | Odds ratio (95% CI)<br>n <sub>cases</sub> =28 |
| DASH               | Quartile 1                    | Basic model <sup>†</sup><br>1.22 (0.75, 1.99)      | 1.03 (0.60, 1.78)                             | 2.29 (0.79, 6.66)                             |
|                    |                               | Confounder model <sup>‡</sup><br>1.10 (0.66, 1.82) | 0.91 (0.51, 1.61)                             | 2.04 (0.68, 6.11)                             |
| Quartile 2         |                               | n <sub>cases</sub> =39                             | n <sub>cases</sub> =28                        | n <sub>cases</sub> =11                        |
|                    | Basic model <sup>†</sup>      | 0.75 (0.44, 1.30)                                  | 0.85 (0.48, 1.50)                             | 0.21 (0.02, 1.80)                             |
|                    | Confounder model <sup>‡</sup> | 0.65 (0.37, 1.14)                                  | 0.72 (0.40, 1.30)                             | 0.19 (0.02, 1.65)                             |
| Quartile 3         |                               | n <sub>cases</sub> =24                             | n <sub>cases</sub> =23                        | n <sub>cases</sub> =1                         |
|                    | Basic model <sup>†</sup>      | 0.88 (0.52, 1.48)                                  | 0.63 (0.34, 1.16)                             | 2.28 (0.78, 6.61)                             |
|                    | Confounder model <sup>‡</sup> | 0.76 (0.44, 1.29)                                  | 0.51 (0.27, 0.98)*                            | 2.16 (0.74, 6.30)                             |
| Quartile 4         |                               | n <sub>cases</sub> =28                             | n <sub>cases</sub> =17                        | n <sub>cases</sub> =11                        |
|                    | Basic model <sup>†</sup>      | Reference                                          | Reference                                     | Reference                                     |
|                    | Confounder model <sup>‡</sup> | Reference                                          | Reference                                     | Reference                                     |
| Trend <sup>§</sup> |                               | n <sub>cases</sub> =33                             | n <sub>cases</sub> =28                        | n <sub>cases</sub> =5                         |
|                    | Basic model <sup>†</sup>      | 0.93 (0.77, 1.12)                                  | 0.96 (0.78, 1.18)                             | 0.82 (0.57, 1.20)                             |
|                    | Confounder model <sup>‡</sup> | 0.96 (0.79, 1.17)                                  | 1.00 (0.80, 1.25)                             | 0.86 (0.58, 1.27)                             |

DASH, Dietary Approaches to Stop Hypertension. CI, Confidence Interval. GHD, Gestational hypertensive disorders. GH, Gestational Hypertension. PE, Preeclampsia.

\*Values are odds ratios (95% confidence interval) that reflect difference in risks of gestational hypertensive disorders, gestational hypertension and preeclampsia per DASH Quartile. Groups are compared to women with the lowest DASH dietary score (Quartile 1) as reference. Estimates are from multiple imputed data. R<sup>2</sup> values for confounder models: GHD, R<sup>2</sup>=0.11; GH, R<sup>2</sup>=0.12; PE, R<sup>2</sup>=0.09. <sup>†</sup>Models are adjusted for gestational age at intake.

<sup>‡</sup>Models are adjusted for parity, prepregnancy BMI, folic acid use, and gestational age at time of intake. <sup>§</sup>Trends were based on multiple logistic regression models with DASH dietary score as SDS. R<sup>2</sup> values for confounder models: GHD, R<sup>2</sup>=0.10; GH, R<sup>2</sup>=0.11; PE, R<sup>2</sup>=0.05.



**Table S18. Associations of maternal DASH score with the risks of gestational hypertensive disorder with adjustment for propensity score (1,780) \*.**

|                         | <b>Bilateral notching</b> | <b>Gestational hypertensive disorders</b> | <b>Gestational hypertension</b> | <b>Preeclampsia</b>    |
|-------------------------|---------------------------|-------------------------------------------|---------------------------------|------------------------|
|                         | Late-pregnancy            | Odds ratio (95% CI)                       | Odds ratio (95% CI)             | Odds ratio (95% CI)    |
| DASH                    | n <sub>cases</sub> =48    | n <sub>cases</sub> =232                   | n <sub>cases</sub> =173         | n <sub>cases</sub> =59 |
| Quartile 1              | 1.18 (0.49, 2.83)         | 1.15 (0.75, 1.75)                         | 0.96 (0.59, 1.57)               | 1.89 (0.84, 4.23)      |
|                         | n <sub>cases</sub> =13    | n <sub>cases</sub> =70                    | n <sub>cases</sub> =51          | n <sub>cases</sub> =19 |
| Quartile 4              | Reference                 | Reference                                 | Reference                       | Reference              |
|                         | n <sub>cases</sub> =14    | n <sub>cases</sub> =59                    | n <sub>cases</sub> =46          | n <sub>cases</sub> =13 |
| <b>Propensity score</b> | 1.46 (0.25, 8.49)         | 0.61 (0.27, 1.36)                         | 0.42 (0.17, 1.05)               | 1.85 (0.39, 8.68)      |

DASH, Dietary Approaches to Stop Hypertension. CI, Confidence Interval. GHD, Gestational hypertensive disorders. GH, Gestational Hypertension. PE, Preeclampsia.

\* Values are odds ratios (95% confidence interval) that reflect difference in risks of bilateral uterine artery notching, gestational hypertensive disorders, gestational hypertension and preeclampsia per DASH quartile. DASH score quartile 1 is compared to DASH score quartile 4 as a reference category. Estimates are from multiple imputed data. Models are adjusted for propensity scores that were calculated using a logistic regression model to predict the likelihood of having a DASH score in quartile 1 rather than quartile 4. R<sup>2</sup> values for confounder models: bilateral notching R<sup>2</sup>=0.001, GHD, R<sup>2</sup>=0.01; GH, R<sup>2</sup>=0.002; PE, R<sup>2</sup>=0.01.

**Figure S1. Flow chart of the study population.**

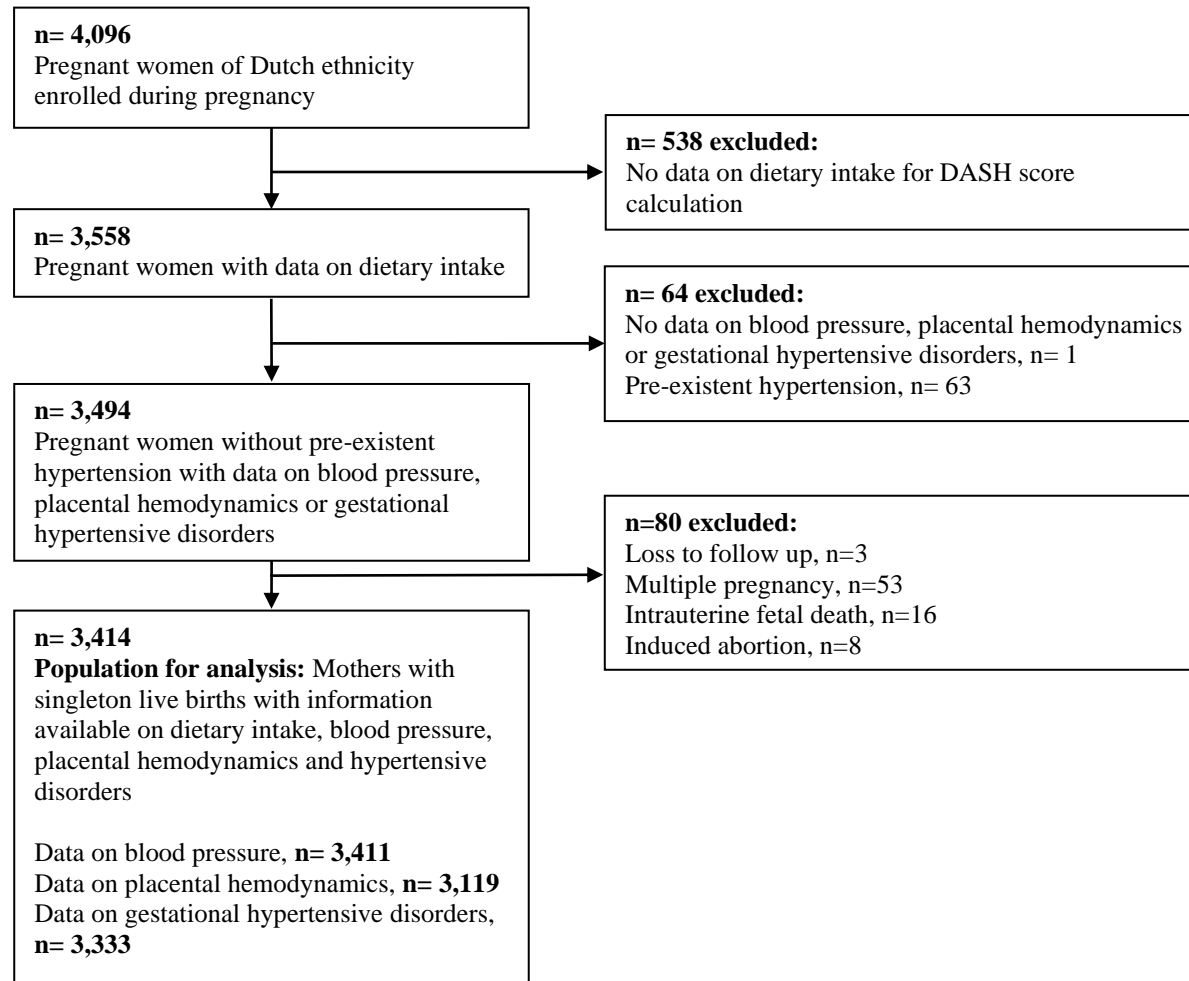

**Figure S2. Flow chart of the non-responders.**

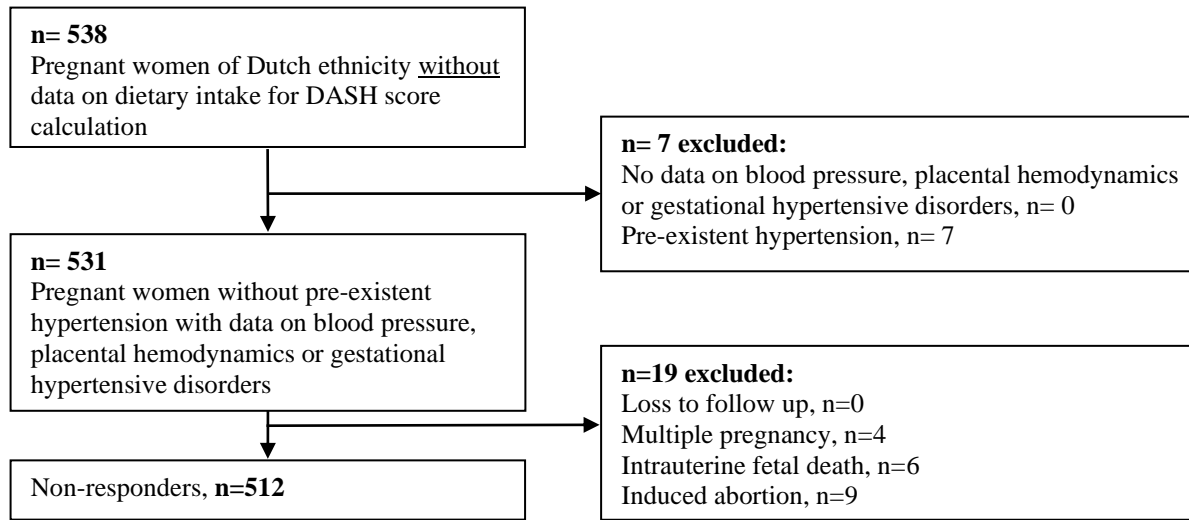

Supplement: JAH3-10-e017503-s001.pdf [file JAH3-10-e017503-s001.pdf]
